# Supplementary material for: Validation of the Swedish Multidimensional Dyspnea Profile (MDP) in outpatients with cardiorespiratory disease
Source: PubMed Central journal article supplement — BMJ Open Respir Res. 2019 Sep 18;6(1):e000381. doi: 10.1136/bmjresp-2018-000381 (PMC6797429; doi:10.1136/bmjresp-2018-000381), 2019-09-18
Supplement: bmjresp-2018-000381supp001.pdf [file bmjresp-2018-000381supp001.pdf]

**Online supplement****Validation of the Swedish Multidimensional Dyspnea Profile (MDP) in outpatients with cardiorespiratory disease**

**Table S1.** Confirmatory factor analysis (CFA) of the proposed two factor model of the Swedish version of the Multidimensional Dyspnea Profile (MDP)

**Table S2.** MDP measurement properties between patients with COPD (n=45) and patients with other diagnoses (n=137) as main cause of breathlessness.

**Table S1.** Confirmatory factor analysis of the proposed two factor model of the Swedish version of the Multidimensional Dyspnea Profile (MDP)

| Item                            | All patients<br>(n=182) |                    | Patients with COPD*<br>(n=45) |                    | Patients with non-COPD*<br>(n=137) |                    |
|---------------------------------|-------------------------|--------------------|-------------------------------|--------------------|------------------------------------|--------------------|
|                                 | Immediate perception    | Emotional response | Immediate perception          | Emotional response | Immediate perception               | Emotional response |
| Muscle work or effort           | 0.790                   | 0.287              | 0.783                         | 0.433              | 0.777                              | 0.254              |
| Air hunger                      | 0.794                   | 0.308              | 0.794                         | 0.365              | 0.798                              | 0.293              |
| Chest tightness or constriction | 0.573                   | 0.440              | 0.568                         | 0.680              | 0.551                              | 0.391              |
| Mental effort or concentration  | 0.752                   | 0.391              | 0.727                         | 0.532              | 0.752                              | 0.358              |
| Breathing a lot                 | 0.631                   | 0.318              | 0.757                         | 0.323              | 0.618                              | 0.272              |
| A1 unpleasantness               | 0.670                   | 0.389              | 0.750                         | 0.294              | 0.657                              | 0.416              |
| Depressed                       | 0.316                   | 0.756              | 0.293                         | 0.916              | 0.297                              | 0.735              |
| Anxious                         | 0.324                   | 0.840              | 0.376                         | 0.763              | 0.322                              | 0.841              |
| Frustrated                      | 0.393                   | 0.648              | 0.614                         | 0.537              | 0.334                              | 0.684              |
| Angry                           | 0.326                   | 0.639              | 0.497                         | 0.699              | 0.258                              | 0.623              |
| Afraid                          | 0.375                   | 0.772              | 0.369                         | 0.695              | 0.395                              | 0.772              |

\* Underlying main cause of breathlessness as judged by the responsible clinician. *Abbreviation:* COPD = chronic obstructive pulmonary disease.

**Table S2.** MDP measurement properties between patients with COPD (n=45) and patients with other diagnoses (n=137) as main cause of breathlessness

| MDP score                                                          | Patients with COPD* (n=45) | Patients with non-COPD* (n=137) |
|--------------------------------------------------------------------|----------------------------|---------------------------------|
| <b>Internal consistency, Cronbach's alpha</b>                      |                            |                                 |
| Total                                                              | 0.956                      | 0.925                           |
| Immediate perception                                               | 0.859                      | 0.818                           |
| Emotional response                                                 | 0.815                      | 0.793                           |
| <b>Test-retest reliability over 2 weeks, ICC (95% CI)#</b>         |                            |                                 |
| Total                                                              | 0.69 (0.31 to 0.88)        | 0.87 (0.78 to 0.93)             |
| Immediate perception                                               | 0.70 (0.31 to 0.89)        | 0.80 (0.65 to 0.89)             |
| Emotional response                                                 | 0.63 (0.27 to 0.84)        | 0.85 (0.74 to 0.91)             |
| A1 unpleasantness                                                  | 0.71 (0.38 to 0.88)        | 0.67 (0.49 to 0.79)             |
| <b>Concurrent validity, Pearson's correlation coefficients of:</b> |                            |                                 |
| <b>MDP total score with:</b>                                       |                            |                                 |
| FEV <sub>1</sub> % of predicted                                    | -0.298                     | -0.342                          |
| mMRC                                                               | 0.530                      | 0.412                           |
| CAT total                                                          | 0.540                      | 0.650                           |
| EQ-5D-5L                                                           | -0.673                     | -0.627                          |
| HADS total                                                         | 0.468                      | 0.391                           |
| HADS anxiety                                                       | 0.620                      | 0.500                           |
| HADS depression                                                    | -0.234                     | -0.088                          |
| FACIT-Fatigue                                                      | -0.708                     | -0.647                          |
| <b>A1 unpleasantness with:</b>                                     |                            |                                 |
| FEV <sub>1</sub> % of predicted                                    | -0.440                     | -0.225                          |
| mMRC                                                               | 0.595                      | 0.380                           |
| CAT total                                                          | 0.594                      | 0.551                           |
| EQ-5D-5L                                                           | -0.568                     | -0.508                          |
| HADS total                                                         | 0.231                      | 0.232                           |
| HADS anxiety                                                       | 0.310                      | 0.325                           |
| HADS depression                                                    | -0.113                     | -0.077                          |
| FACIT-Fatigue                                                      | -0.569                     | -0.576                          |

\* Underlying main cause of breathlessness as judged by the responsible clinician.

# Test-retest reliability between two weeks and baseline in people who rated their breathlessness as unchanged.

*Abbreviations:* COPD = chronic obstructive pulmonary disease; ICC = intraclass correlation coefficient; MDP = Multidimensional Dyspnea Profile.
